# Supplementary material for: Construction of ZnCo2S4@Ni(OH)2 core–shell nanostructures for asymmetric supercapacitors with high energy densities
Source: Royal Society of Chemistry journal article supplement (doi:10.1039/c9qi00653b), 2019-01-01
Supplement: c9qi00653b1.pdf [file c9qi00653b1.pdf]

**Figure S1**

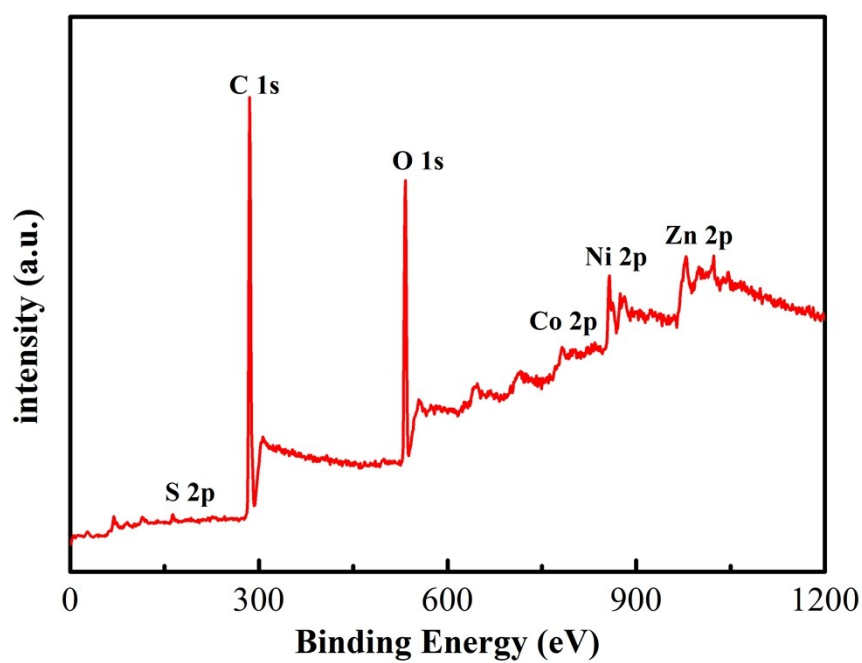

**Figure S1.** The XPS survey curve of  $\text{ZnCo}_2\text{S}_4@\text{Ni}(\text{OH})_2$

**Figure S2**

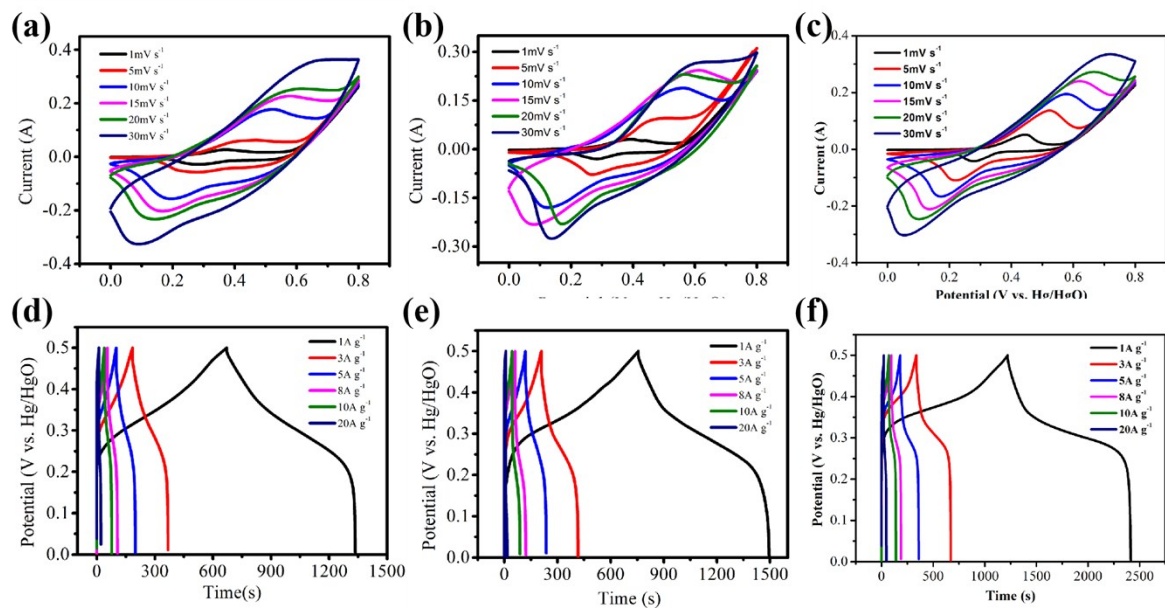

**Figure S2.** CV and GCD curves of ZnCo<sub>2</sub>O<sub>4</sub>, ZnCo<sub>2</sub>S<sub>4</sub> and ZnCo<sub>2</sub>S<sub>4</sub>@Ni(OH)<sub>2</sub> electrodes at different scan rates and different current densities.

**Table S1**

| Materials                                                                                  | Electrolyte Type | Energy density              | Power density                  | Ref      |
|--------------------------------------------------------------------------------------------|------------------|-----------------------------|--------------------------------|----------|
| Ni-Co-O@//MnO <sub>2</sub> /AC                                                             | Aqueous          | 13.3 Wh kg <sup>-1</sup>    | 7.5 kW kg <sup>-1</sup>        | 1        |
| NiCo <sub>2</sub> O <sub>4</sub> //AC                                                      | Aqueous          | 11.6 Wh kg <sup>-1</sup>    | 5.22 kW kg <sup>-1</sup>       | 2        |
| Ni-Co-S//AC                                                                                | Aqueous          | 21.6 Wh kg <sup>-1</sup>    | 0.1349 kW kg <sup>-1</sup>     | 3        |
| r-CoNi <sub>2</sub> S <sub>4</sub> //AC                                                    | Solid state      | 55.4 Wh kg <sup>-1</sup>    | 8 kW kg <sup>-1</sup>          | 4        |
| CoFe <sub>2</sub> O <sub>4</sub> /NG                                                       | Aqueous          | 23 Wh kg <sup>-1</sup>      | 0.79 kW kg <sup>-1</sup>       | 5        |
| ZnCo <sub>2</sub> O <sub>4</sub> @Ni <sub>x</sub> Co <sub>2x</sub> (OH) <sub>6x</sub> //AC | Solid state      | 26.2 Wh kg <sup>-1</sup>    | 0.5118 kW kg <sup>-1</sup>     | 6        |
| NiCo <sub>2</sub> O <sub>4</sub> -MnO <sub>2</sub> //AG                                    | Aqueous          | 9.4 Wh kg <sup>-1</sup>     | 0.175 Wh kg <sup>-1</sup>      | 7        |
| MoS <sub>2</sub> -based SCs                                                                | Aqueous          | 5.42 Wh kg <sup>-1</sup>    | 0.128 Wh kg <sup>-1</sup>      | 8        |
| Ni-Co-Fe hydroxide                                                                         | Aqueous          | 3.89 Wh kg <sup>-1</sup>    | 1.25 Wh kg <sup>-1</sup>       | 9        |
| Ni(OH) <sub>2</sub> //AC                                                                   | Aqueous          | 12.6 Wh kg <sup>-1</sup>    | 1.67 Wh kg <sup>-1</sup>       | 10       |
| NiCo <sub>2</sub> S <sub>4</sub> //AC                                                      | Aqueous          | 27.2 Wh kg <sup>-1</sup>    | 0.87 kW kg <sup>-1</sup>       | 11       |
| <b>ZnCo<sub>2</sub>S<sub>4</sub>@Ni(OH)<sub>2</sub>//AC</b>                                | <b>Aqueous</b>   | <b>44Wh kg<sup>-1</sup></b> | <b>0.83 kW kg<sup>-1</sup></b> | <b>★</b> |

Note: ★ Refers to this work

Table S1. Comparison of energy density with other asymmetric supercapacitors.

References:

1. X. Wu, L. Meng, Q. Wang, W. Zhang and Y. Wang, *Electrochim. Acta*, 2019, **295**, 532-539.
2. X. Wang, Y. Fang, B. Shi, F. Huang, F. Rong and R. Que, *Chem. Eng. J.*, 2018, **344**, 311-319.
3. Y. Liu, Q. Lu, Z. Huang, S. Sun, B. Yu, U. Evariste, G. Jiang and J. Yao, *J. Alloy. Compd.*, 2018, **762**, 301-311.
4. X. Cao, J. He, H. Li, L. Kang, X. He, J. Sun, R. Jiang, H. Xu, Z. Lei and Z.-H. Liu, *Small*, 2018, **14**, 1800998.
5. X. Guo, C. Yang, G. Huang, Q. Mou, H. Zhang and B. He, *J. Alloy. Compd.*, 2018, **764**, 128-135.
6. W. Fu, Y. Wang, W. Han, Z. Zhang, H. Zha and E. Xie, *J. Mater. Chem. A*, 2016, **4**, 173-182.
7. Y. Zhou, L. Ma, M. Gan, M. Ye, X. Li, Y. Zhai, F. Yan and F. Cao, *Appl. Surf. Sci.*, 2018, **444**, 1-9.
8. Y. Sun, W. Zhong, Y. Wang, X. Xu, T. Wang, L. Wu and Y. Du, *ACS Appl. Mater. Interfaces*, 2017, **9**, 34243-34255.
9. X. Shao, X. Zheng, W. Zou, Y. Luo, Q. Cen, Q. Ye, X. Xu and F. Wang, *Electrochim. Acta*, 2017, **248**, 322-332.
10. J. J. William, I. M. Babu and G. Muralidharan, *Mater. Lett.*, 2019, **238**, 35-37.
11. Y. Li, F. An, H. Wu, S. Zhu, C. Lin, M. Xia, K. Xue, D. Zhang and K. Lian, *J. Power Sources*, 2019, **427**, 138-144.
